# Supplementary material for: Relationship between Tobacco, cagA and vacA i1 Virulence Factors and Bacterial Load in Patients Infected by Helicobacter pylori
Source: PubMed Central journal article supplement (PMC4368826; doi:10.1371/journal.pone.0120444), 2015-03-20
Supplement: pone.0120444.s001.pdf [file pone.0120444.s001.pdf]

S1 Table. Baseline characteristics of patients as a function of Smoking Status at endoscope.

|                                                   | <b>Total<br/>N=155</b> | <b>column<br/>%</b> | <b>No-Active<br/>smokers<br/>N=113</b> | <b>row<br/>%</b> | <b>Active<br/>Smokers<br/>N=42</b> | <b>row<br/>%</b> | <b>p<br/>value</b> |
|---------------------------------------------------|------------------------|---------------------|----------------------------------------|------------------|------------------------------------|------------------|--------------------|
|                                                   | 55.9                   |                     |                                        |                  |                                    |                  |                    |
| Age: Mean [SD] <sup>a</sup>                       | [17.2]                 | --                  | 58.7 [17.2]                            | --               | 47.4 [14.4]                        | --               | <0.001             |
| Women                                             | 69                     | 45%                 | 56                                     | 81%              | 13                                 | 19%              | 0.04               |
| Men                                               | 86                     | 55%                 | 57                                     | 66%              | 29                                 | 34%              |                    |
| Alcoholism (Yes) <sup>b</sup>                     | 8                      | 5%                  | 5                                      | 63%              | 3                                  | 37%              | 0.51               |
| Alcoholism (No)                                   | 146                    | 94%                 | 107                                    | 73%              | 39                                 | 27%              |                    |
| Coffe/Te consumption<br>(Yes) <sup>c</sup>        | 63                     | 41%                 | 42                                     | 67%              | 21                                 | 33%              | 0.9                |
| Coffe/Te (No)                                     | 40                     | 26%                 | 27                                     | 68%              | 13                                 | 32%              |                    |
| Comorbidity (Yes) <sup>d</sup>                    | 58                     | 37%                 | 49                                     | 85%              | 9                                  | 15%              | 0.02               |
| Comorbidity (No)                                  | 78                     | 50%                 | 52                                     | 67%              | 26                                 | 33%              |                    |
| PPI consumption in<br>previous days               | 46                     | 30%                 | 39                                     | 85%              | 7                                  | 15%              | 0.06               |
| PPI (No)                                          | 89                     | 57%                 | 62                                     | 70%              | 27                                 | 30%              |                    |
| NSAID consumption in<br>previous days             | 39                     | 25%                 | 24                                     | 62%              | 15                                 | 38%              | 0.02               |
| NSAID (No)                                        | 96                     | 62%                 | 77                                     | 80%              | 19                                 | 20%              |                    |
| Antibiotic consumption in<br>previous days        | 5                      | 3%                  | 5                                      | 100%             | 0                                  | 0%               | 0.18               |
| Antibiotic (No)                                   | 128                    | 83%                 | 94                                     | 73%              | 34                                 | 27%              |                    |
| Upper digestive tract<br>hemorrhage (UDTH)-Yes    | 78                     | 50%                 | 59                                     | 76%              | 19                                 | 24%              | 0.44               |
| UDTH (No)                                         | 77                     | 50%                 | 54                                     | 70%              | 23                                 | 30%              |                    |
| <i>H. Pylori</i> Infection (Gold<br>standard)     | 85                     | 55%                 | 56                                     | 66%              | 29                                 | 34%              | 0.03               |
| No-Infection                                      | 70                     | 45%                 | 57                                     | 81%              | 13                                 | 19%              |                    |
| <i>H. Pylori</i> Infection (Real-<br>Time PCR >0) | 106                    | 68%                 | 72                                     | 68%              | 34                                 | 32%              | 0.04               |
| No-Infection                                      | 45                     | 29%                 | 38                                     | 84%              | 7                                  | 16%              |                    |

<sup>a</sup>SD denotes Standard Deviation

<sup>b</sup>Alcoholism (high alcohol consumption) was defined as a consumption of more than 80g/day in men and 60 g/day in women

<sup>c</sup>A Coffee/Tea Drinker at the endoscope was defined as someone having consumed at least two cups at week for at least one year.

<sup>d</sup>Comorbidity was defined as someone having high blood pressure, diabetes, cardiopathy, chronic obstructive pulmonary disease, or kidney failure.
