# Supplementary material for: Relationship between Tobacco, cagA and vacA i1 Virulence Factors and Bacterial Load in Patients Infected by Helicobacter pylori
Source: PubMed Central journal article supplement (PMC4368826; doi:10.1371/journal.pone.0120444), 2015-03-20
Supplement: pone.0120444.s002.pdf [file pone.0120444.s002.pdf]

S2 Table. Primers used in the study of the virulence factors of *H. pylori*

|                | <i>cagA Gene</i>                   | <i>vacA Gene</i>                   |
|----------------|------------------------------------|------------------------------------|
| F-PCR          | 5-GAGCAAGCRYTAGCCGAT CTCA-3        | 5-ACAAGSAATACGACTTAT ACAAATCCT-3   |
| Sequence-Ext_F |                                    |                                    |
| R-PCR-1        | 5-TTGTAGAATCTTTGAGCTTGTCTATCATTG-3 | 5-TTGCCACAAAT CCA GTC TGC-3        |
| Sequence-Ext_R |                                    |                                    |
| F-PCR-2        | 5-GTTAARAATRGTGTRAAYGG-3           | 5-GTTGGGATTGGGGGA ATGCCG-3         |
| Sequence-Int_F |                                    |                                    |
| F-PCR-2        | 5-TTTAGCTTCTGATACCGC-3             | 5-TTTGAAGTGYTATCGTG CTGTATGAAGGG-3 |
| Sequence-Int_F |                                    |                                    |
